# Supplementary material
Source: PubMed Central journal article supplement (PMC3398720)
Supplement: npp201267x1.pdf [file npp201267x1.pdf]

Supplementary Fig 1

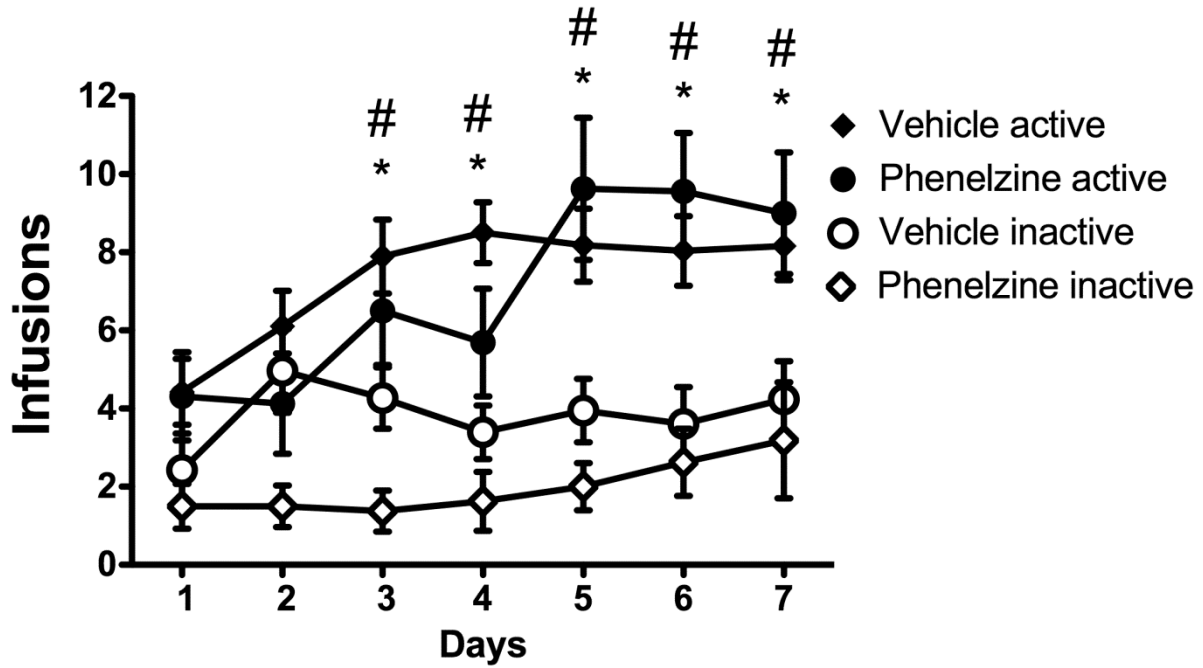

The MAOI phenelzine (2 mg/kg, i.p.; n = 16) did not affect the acquisition of nicotine self-administration compared with vehicle-treated rats (n = 28). \* $p < 0.05$ , active vs. inactive for phenelzine; # $p < 0.05$ , active vs. inactive for vehicle.
